# Supplementary material
Source: publisher figshare collection journal article supplement (https://karger.figshare.com/ndownloader/files/28959561)
Supplement: Supplementary file 1 [file 28959561]

**
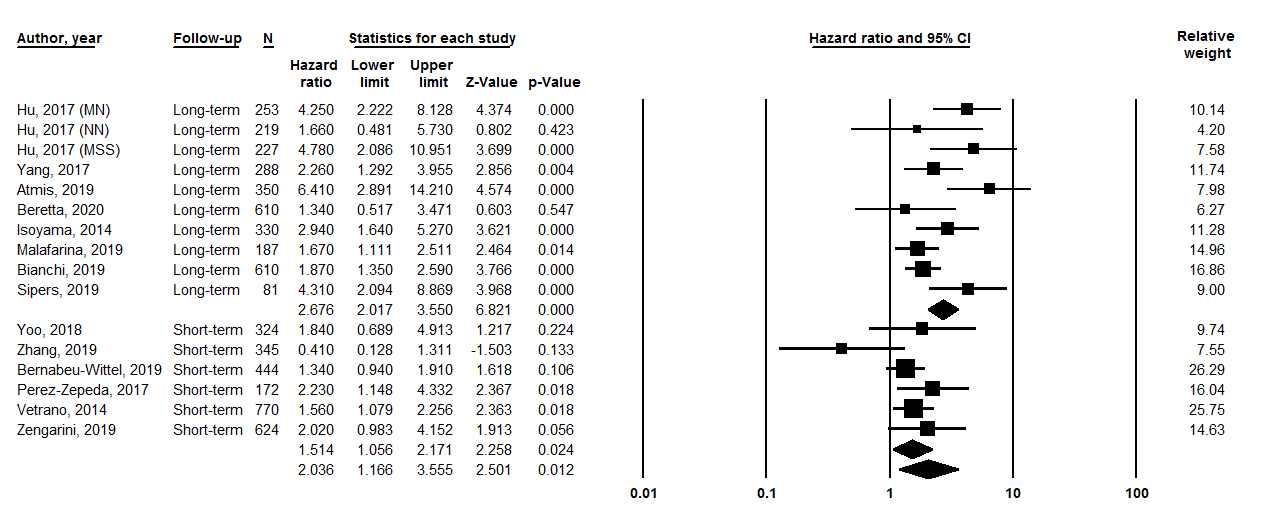
Supplementary Figure 7.** Meta-analysis of the association between sarcopenia and mortality in inpatients presented by hazard ratios, stratified by long- and short-term follow-up

Heterogeneity (I2): long-term follow-up (58.2%), short-term follow-up (32.5%).
MN: sarcopenia with a risk of malnutrition, NN: sarcopenia with normal nutrition, MSS: malnutrition-sarcopenia syndrome
